# Supplementary material
Source: PubMed Central journal article supplement (PMC3023373)
Supplement: supp_00778.2010_suppdata.pdf [file supp_00778.2010_suppdata.pdf]

1           **Methods**

2           *Identification of the Scalp Regions of Interest*

3           In order to determine Scalp Regions of Interests (S-ROIs), for each time  
4 intervals and frequency bands, the “responsive electrodes” were identified on the  
5 basis of the group-mean topographical maps obtained from the spectral analysis  
6 and reported in Figure 2 A of the paper. An electrode was defined as “responsive” if  
7 it showed intense power perturbation in comparison to the baseline period. After  
8 the identification of the responsive electrodes, the selections of the two experiments  
9 were compared and the S-ROIs edges were defined. This was also guided by the data  
10 reported previously published on reaching (Babiloni et al. 1999; Bernier et al. 2009;  
11 Naranjo et al. 2007). Finally, for the selected electrodes, we checked whether they  
12 showed significant variation of power with respect to the baseline period in any of  
13 the time intervals and frequency ranges by using a statistical nonparametric  
14 mapping procedure (SnMP, simple-threshold,  $p = 0.05$ ). To do so, we computed  
15 paired sample t-test at channels level between the condition of interest and the  
16 baseline. Significance was determined on the basis of permutation test (Nichols and  
17 Holmes 2002) as described in previous works (Huber et al. 2006; Huber et al. 2004).

18           *Event Related Spectral Perturbation*

19           To investigate the impact of the baseline selection on the brain activation patterns  
20 and on the correlation findings, Event Related Spectral Perturbation (ERSP) estimation  
21 was computed on the same set of data by using the entire epoch as a baseline (1.5 s). All  
22 the remaining procedures were exactly the same as those described in the original  
23 manuscript.

24           **Results**

25           *Temporal changes in EEG power through scalp locations and frequency bands.*

26   Figure 1 (supplemental material) shows the brain activation patterns across selected time  
27   windows and frequencies. As expected, in the Pre-Stim interval we observed  
28   synchronization over the centro-lateral sites for the alpha2 and beta bands. This increase  
29   was mostly evident at electrodes contralateral to the movement side. Movement planning  
30   and execution was accompanied by an increment of theta power over the centro-medial  
31   and –lateral electrodes in the period. As for the alpha and beta bands, we found  
32   attenuation of power during the execution of the movement that was seen bilaterally over  
33   the centro-lateral sites. However the desynchronization was greater for electrodes  
34   contralateral to the movement side. Beta also showed power decrease over the frontal  
35   region.

36           *Correlation analysis.* When we correlated the activity for the selected time  
37   windows and frequency bands with kinematic indices, we observed some differences in  
38   comparison to the results obtained with the short baseline analysis. As expected, the main  
39   difference was the absence of correlation between beta activity and reaction times (Table  
40   1, supplemental material). The results for the other correlations were similar to those  
41   reported in the original manuscript. Peak velocity and peak acceleration correlated with  
42   theta activity over posterior sites selectively in the stage of movement planning, while  
43   movement extent correlated with low alpha and theta during movement execution.

44           **Discussion**

45           This analysis captured the well-known alpha and beta synchronization activity  
46   following movement offset. Besides this main difference however, the patterns of power

47 variation across time and frequency bands were similar to those reported in the  
48 manuscript.

49         The beta rebound might also partially explain the reported high coherent activity  
50 preceding stimulus appearance, which was interpreted as expression of attention  
51 modulation. However, our results suggest that the pre-stimulus beta coherence reflects, at  
52 least in part, the formation of transient neural assemblies responsible for efficient  
53 perception and motor performance through the modulation of attention. In fact, if the beta  
54 coherence decreases were a mere consequence of beta rebound, it should be most evident  
55 across the channel pairs with maximal post-movement power increase. This was not the  
56 case in our study: in fact, we observed long-range beta phase coupling that involved  
57 channels with minimal power variation induced by motor processes (Figure 2 and Figure  
58 3 in the paper). In addition, we actually observed significant beta-1 increase in the  
59 planning stage between channels known to reflect maximally motor-related activity (C3,  
60 CP3, CZ, FC3; Figure 3).

61         As for the correlations, we did not observe the linear relation between reaction  
62 times and beta activity, which has been interpreted as the expression of the efficient  
63 disengagement from the “idle state” following movement execution. This phenomenon  
64 was canceled out when we used the entire epoch as reference. It is likely that the baseline  
65 selection might have worked as a zoom out by flattening the fast changes in brain  
66 dynamics that follow the beta and alpha rebound.

67

68

69

70 **References**

71 **Babiloni C, Carducci F, Cincotti F, Rossini PM, Neuper C, Pfurtscheller G, and**

72 **Babiloni F.** Human movement-related potentials vs desynchronization of EEG alpha

73 rhythm: a high-resolution EEG study. *Neuroimage* 10: 658-665, 1999.

74

75 **Bernier PM, Burle B, Hasbroucq T, and Blouin J.** Spatio-temporal dynamics of reach-

76 related neural activity for visual and somatosensory targets. *Neuroimage* 47: 1767-1777,

77 2009.

78

79 **Huber R, Ghilardi MF, Massimini M, Ferrarelli F, Riedner BA, Peterson MJ, and**

80 **Tononi G.** Arm immobilization causes cortical plastic changes and locally decreases

81 sleep slow wave activity. *Nat Neurosci* 9: 1169-1176, 2006.

82

83 **Huber R, Ghilardi MF, Massimini M, and Tononi G.** Local sleep and learning. *Nature*

84 430: 78-81, 2004.

85

86 **Naranjo JR, Brovelli A, Longo R, Budai R, Kristeva R, and Battaglini PP.** EEG

87 dynamics of the frontoparietal network during reaching preparation in humans.

88 *Neuroimage* 34: 1673-1682, 2007.

89

90 **Nichols TE, and Holmes AP.** Nonparametric permutation tests for functional

91 neuroimaging: a primer with examples. *Hum Brain Mapp* 15: 1-25, 2002.

92

**Figure 1 Supplemental Material.** Group-mean ERSP for the 5 selected frequency bands are plotted on the scalp at the different time intervals of interest. The ERSP was computed using the entire epoch as baseline.

**Table1 Supplemental Material.** Correlations between brain activity and behavioral indices for selected time windows and frequency bands (baseline: 1.5 s, entire epoch).
