# Supplementary material
Source: PubMed Central journal article supplement (PMC3023373)
Supplement: supp_00778.2010_tableS1.pdf [file supp_00778.2010_tableS1.pdf]

1 Table 1 Supplemental Material. Correlations  
 2

| <i>PRE-STIMULUS</i>                   | L-CL  | R-CL  | L-PL         | R-PL         | L-PO         | R-PO         | C-Fr  | C-Med | A-Fr         |
|---------------------------------------|-------|-------|--------------|--------------|--------------|--------------|-------|-------|--------------|
| <b>Low Beta</b><br>Reaction Time Mean | 0.28  | 0.30  | 0.17         | 0.38         | 0.10         | 0.20         | 0.38  | 0.30  | 0.56         |
| <i>MOTOR PLAN</i>                     |       |       |              |              |              |              |       |       |              |
| <b>Low alpha</b><br>Movement Extent   | -0.04 | 0.03  | -0.27        | -0.20        | -0.22        | -0.16        | 0.19  | 0.27  | 0.07         |
| Pk Velocity                           | -0.22 | -0.39 | <b>-0.62</b> | <b>-0.63</b> | <b>-0.64</b> | <b>-0.63</b> | -0.17 | -0.19 | -0.26        |
| Pk Acceleration                       | -0.25 | -0.51 | -0.59        | <b>-0.63</b> | -0.55        | -0.56        | -0.27 | -0.33 | -0.30        |
| <i>MOTOR EXECUTION</i>                |       |       |              |              |              |              |       |       |              |
| <b>Theta</b><br>Movement Extent       | -0.52 | -0.07 | <b>-0.72</b> | <b>-0.64</b> | -0.59        | -0.57        | -0.40 | -0.49 | -0.54        |
| Pk Velocity                           | -0.25 | 0.02  | -0.27        | -0.30        | -0.24        | -0.27        | -0.38 | -0.14 | -0.56        |
| Pk Acceleration                       | -0.12 | 0.08  | -0.05        | -0.09        | -0.01        | -0.06        | -0.27 | 0.01  | -0.43        |
| <b>Low alpha</b><br>Movement Extent   | -0.52 | -0.21 | <b>-0.64</b> | -0.52        | <b>-0.67</b> | <b>-0.68</b> | -0.49 | -0.47 | <b>-0.62</b> |
| Pk Velocity                           | -0.43 | -0.29 | -0.34        | -0.49        | -0.52        | -0.54        | -0.55 | -0.29 | <b>-0.62</b> |
| Pk Acceleration                       | -0.29 | -0.17 | -0.13        | -0.27        | -0.27        | -0.29        | -0.39 | -0.11 | -0.42        |
| <i>r&gt;/0.6/, p&lt;0.05</i>          |       |       |              |              |              |              |       |       |              |

3  
 4
