# Supplementary material
Source: PubMed Central journal article supplement (PMC3023373)

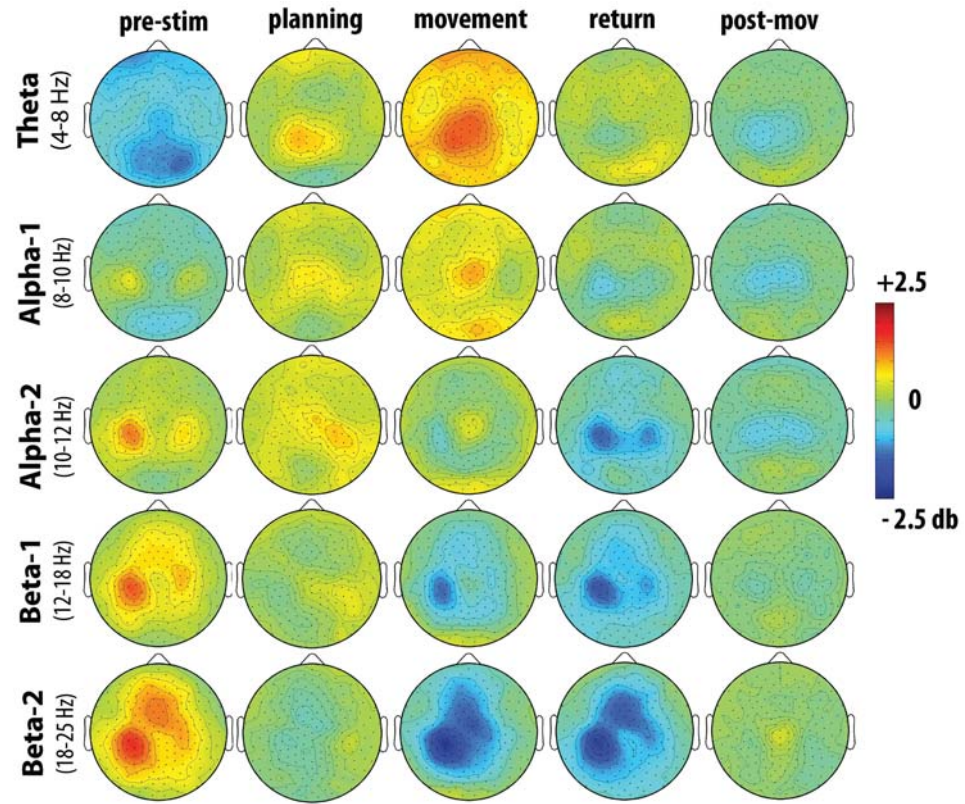

Supplement: supp_00778.2010_figS1.pdf [file supp_00778.2010_figS1.pdf]
